# Supplementary material for: From crystal structure of α-conotoxin GIC in complex with Ac-AChBP to molecular determinants of its high selectivity for α3β2 nAChR
Source: PubMed Central journal article supplement (PMC4772116; doi:10.1038/srep22349), 2016-03-01
Supplement: srep22349-s1.pdf [file srep22349-s1.pdf]

## Supplementary information

### From crystal structure of $\alpha$ -conotoxin GIC in complex with *Ac*-AChBP to molecular determinants of its high selectivity for $\alpha 3\beta 2$ nAChR

Bo Lin<sup>1,#</sup>, Manyu Xu<sup>2,#</sup>, Xiaopeng Zhu<sup>1</sup>, Yong Wu<sup>1</sup>, Xi Liu<sup>2</sup>, Dongting Zhangsun<sup>1</sup>,  
Yuanyan Hu<sup>1</sup>, Shi-Hua Xiang<sup>4</sup>, Igor E. Kasheverov<sup>3</sup>, Victor I. Tsetlin<sup>3</sup>, Xinquan  
Wang<sup>2,\*</sup> and Sulan Luo<sup>1,\*</sup>

<sup>1</sup>Key Laboratory of Tropical Biological Resources, Ministry of Education, Key Lab for Marine Drugs of Haikou, Hainan University, Haikou Hainan 570228, P. R. China.

<sup>2</sup>Ministry of Education Key Laboratory of Protein Science, Center for Structural Biology, School of Life Sciences, Tsinghua University, Beijing 100084, P. R. China.

<sup>3</sup>Shemyakin-Ovchinnikov Institute of Bioorganic Chemistry, Russian Academy of Sciences, Miklukho-Maklaya Street, 16/10 Moscow 117997, Russia.

<sup>4</sup>Nebraska Center for Virology, School of Veterinary Medicine and Biological Sciences, University of Nebraska-Lincoln, Lincoln, NE 68583, USA.

**#Equal contribution**

**\*Corresponding authors:**

Sulan Luo, Ph.D.

Key Laboratory of Tropical Biological Resources, Ministry of Education, Hainan University, Haikou Hainan 570228, P. R. China

Phone: (86) 898 66289538; Fax: (86) 898 66276720.

E-mail: [luosulan2003@163.com](mailto:luosulan2003@163.com)

Xinquan Wang, Ph.D.

Ministry of Education Key Laboratory of Protein Science, Center for Structural Biology, School of Life Sciences, Tsinghua University, Beijing 100084, P. R. China.

E-mail: [xinquanwang@mail.tsinghua.edu.cn](mailto:xinquanwang@mail.tsinghua.edu.cn)

**Running Title:** Co-crystal structure of  $\alpha$ -conotoxin GIC and acetylcholine binding proteins

**Table S1|Crystal diffraction data collection and structural refinement statistics**

| <b>Data collection</b>                                  |                                               |
|---------------------------------------------------------|-----------------------------------------------|
| Beamline                                                | SSRF BL17U                                    |
| Wavelength                                              | 0.9796 Å                                      |
| Space group                                             | P2 <sub>1</sub> 2 <sub>1</sub> 2 <sub>1</sub> |
| <b>Cell dimensions</b>                                  |                                               |
| <i>a</i> , <i>b</i> , <i>c</i> (Å)                      | 78.6, 84.9, 208.6                             |
| $\alpha$ , $\beta$ , $\gamma$ (°)                       | 90.0, 90.0, 90.0                              |
| Resolution (Å)                                          | 50-2.1                                        |
| <i>R</i> <sub>merge</sub> (%)                           | 8.8 (67.7)                                    |
| <i>I</i> / $\sigma I$                                   | 18.7 (3.5)                                    |
| Completeness (%)                                        | 96.9 (93.5)                                   |
| Redundancy                                              | 6.7 (6.9)                                     |
| <b>Refinement</b>                                       |                                               |
| Resolution (Å)                                          | 43.5-2.1                                      |
| No. Reflections                                         | 85409                                         |
| <i>R</i> <sub>work</sub> / <i>R</i> <sub>free</sub> (%) | 19.7/23.7                                     |
| <b>No. atoms</b>                                        |                                               |
| Protein                                                 | 8299                                          |
| Ligand/ion                                              | 545                                           |
| Water                                                   | 521                                           |
| <b>B factor (Å<sup>2</sup>)</b>                         |                                               |
| Protein                                                 | 41.1                                          |
| Ligand/ion                                              | 45.3                                          |
| Water                                                   | 42.5                                          |
| <b>r.m.s. deviations</b>                                |                                               |
| Bond lengths (Å)                                        | 0.008                                         |
| Bond angles (°)                                         | 1.104                                         |

**Table S2 | Contacts between *Ac*-AChBP and  $\alpha$ -conotoxins ( $d < 4 \text{ \AA}$ )**

| <i>Ac</i> -AChBP          | GIC <sup>a</sup>                             | PnIA(A10L,<br>D14K) <sup>b</sup>             | TxIA(A10L) <sup>c</sup>                      | ImI <sup>d</sup>      | BuIA                       |
|---------------------------|----------------------------------------------|----------------------------------------------|----------------------------------------------|-----------------------|----------------------------|
| <i>Principal side</i>     |                                              |                                              |                                              |                       |                            |
| <b>Lys-23</b>             |                                              |                                              |                                              | Arg-11                |                            |
| <b>Tyr-91</b>             | His-5                                        | Leu-5, Pro-7                                 | Arg-5, Pro-6,<br>Pro-7                       | Arg-7                 | Pro-7                      |
| <b>Ser-144</b>            |                                              | Pro-7                                        | Pro-7                                        | Arg-7                 | Pro-7                      |
| <b>Trp-145</b>            | Pro-6, Ala-7                                 | Pro-6, Pro-7                                 | Pro-6, Pro-7                                 | Pro-6, Arg-7          | Pro-6, Pro-7               |
| <b>Val-146</b>            | Ala-7                                        | Leu-10,<br>Asn-11                            | Pro-7, Leu-10                                | Arg-7                 | Pro-7                      |
| <b>Tyr-147</b>            |                                              |                                              | Pro-7                                        | Arg-7                 | Pro-7                      |
| <b>Ser148</b>             | Asn-11                                       | Asn-11                                       | Asn-11                                       |                       |                            |
| <b>Glu151</b>             |                                              | Asn-11                                       |                                              |                       |                            |
| <b>Tyr-186</b>            | Gly-1, Cys-2,<br>His-5, Cys-8                | Gly-1, Cys-2,<br>Leu-5, Cys-8                | Gly-1, Cys-2,<br>Arg-5                       | Gly-1,Cys-2,<br>Asp-5 | Gly-1,<br>Cys-2, Thr-5     |
| <b>Cys-188</b>            | Cys-2                                        | Cys-2, Tyr-15                                | Cys-2                                        | Cys-2                 | Cys-2                      |
| <b>Cys-189</b>            | Asn-12                                       | Cys-2, Asn-12                                | Cys-2,<br>Asn-12                             | Cys-2                 | Cys-2,<br>Tyr-12           |
| <b>Glu-191</b>            | Asn-11,<br>Asn-12                            | Asn-12                                       | Asn-11,<br>Asn-12                            | Arg-11                | Leu-11,<br>Tyr-12          |
| <b>Tyr-193</b>            | His-5, Ala-7,<br>Cys-8,<br>Asn-11,<br>Asn-12 | Leu-5, Pro-7,<br>Cys-8,<br>Asn-11,<br>Asn-12 | Arg-5, Pro-7,<br>Cys-8,<br>Asn-11,<br>Asn-12 | Arg-7, Cys-8          | Pro-7,<br>Cys-8,<br>Tyr-12 |
| <b>Ile-194</b>            |                                              |                                              |                                              | Arg-7                 |                            |
| <b>Asp-195</b>            |                                              |                                              | Arg-5                                        |                       |                            |
| <i>Complementary side</i> |                                              |                                              |                                              |                       |                            |
| <b>Thr-34</b>             | Ser-4                                        |                                              | Cys-3                                        |                       | Cys-3                      |

|                |                         |                          |                          |              |                            |
|----------------|-------------------------|--------------------------|--------------------------|--------------|----------------------------|
| <b>Tyr-53</b>  | Ser-4, Pro-6            | Pro-6                    | Ser-4, Pro-6             | Ser-4        | Ser-4                      |
| <b>Gln-55</b>  | Ala-9,<br>Cys-16        |                          | Ile-9                    | Cys-3        | Cys-3,<br>Ala-9,<br>Cys-13 |
| <b>Arg-57</b>  | Gln-13,                 | Pro-13                   | Pro-13                   |              | Cys-13                     |
| <b>Asp-75</b>  |                         |                          |                          | Trp-10       |                            |
| <b>Arg-77</b>  | Asn-11                  | Asn-11                   | Asn-11                   | Trp-10       |                            |
| <b>Ile-104</b> |                         | Leu-10                   |                          |              |                            |
| <b>Val-106</b> | Gly-10,<br>Gln-13       | Leu-10                   | Leu-10                   | Trp-10       | Val-10                     |
| <b>Thr-108</b> | Gln-13                  |                          |                          | Trp-10       |                            |
| <b>Asp-110</b> |                         | Lys-14                   |                          |              |                            |
| <b>Ser-112</b> | Gln-13                  | Lys-14                   |                          |              |                            |
| <b>Met-114</b> | Ala-9,Gly-10,<br>Gln-13 | Ala-9, Leu-10,<br>Pro-13 | Ile-9, Leu-10,<br>Pro-13 | Trp-10       | Val-10,<br>Leu-11          |
| <b>Ile-116</b> | Pro-6, Ala-9            | Pro-6, Ala-9,<br>Leu-10, | Leu-10                   | Pro-6, Ala-9 | Ala-9,<br>Val-10           |
| <b>Asp-157</b> | Cys-16                  |                          |                          |              |                            |
| <b>Asp-162</b> | Ser-4                   | Ser-4                    | Cys-3                    | Ser-4        | Cys-3                      |
| <b>Ser-164</b> | Ser-4                   | Ser-4                    | Ser-4                    | Gly-1, Ser-4 | Ser-4                      |
| <b>Ser-165</b> | Ser-4                   |                          | Ser-4                    |              | Ser-4                      |

**Table S3 | Affinity (as  $K_i$  or  $IC_{50}$ s, nM) of four  $\alpha$ -conotoxins for *Ac*-AChBP, AChBP from *Lymnaea stagnalis* (*Ls*-AChBP) and different human or rat nAChR subtypes**

| $\alpha$ -conotoxins | <i>Ac</i> -AChB         | <i>Ls</i> -AChBP            | h $\alpha$ 3 $\beta$ 2 | h $\alpha$ 3 $\beta$ 4 | h $\alpha$ 7     | r $\alpha$ 3 $\beta$ 2 | r $\alpha$ 7    |
|----------------------|-------------------------|-----------------------------|------------------------|------------------------|------------------|------------------------|-----------------|
|                      | P                       |                             |                        |                        |                  |                        |                 |
| GIC                  | 29 $\pm$ 2 <sup>a</sup> | 220 $\pm$ 10 <sup>a</sup>   | 1 <sup>b</sup>         | 755 <sup>b</sup>       |                  |                        |                 |
| ImI                  | 33 $\pm$ 5 <sup>c</sup> | 4140 $\pm$ 400 <sup>c</sup> | 41 <sup>d</sup>        | 3390 <sup>d</sup>      | 132 <sup>e</sup> | >5000 <sup>f</sup>     | 69 <sup>g</sup> |
| PnIA(A10L,D14K)      | 28 $\pm$ 6 <sup>h</sup> | 13 $\pm$ 2 <sup>h</sup>     |                        |                        | 260 <sup>h</sup> |                        |                 |
| TxIA(A10L)           |                         | 1.1 <sup>i</sup>            |                        |                        |                  | 2.0 <sup>i</sup>       | 39 <sup>i</sup> |

Data from <sup>a</sup> this work, <sup>b</sup> ref. <sup>11</sup>, <sup>c</sup> ref. <sup>9</sup>, <sup>d</sup> ref. <sup>21</sup>, <sup>e</sup> ref. <sup>28</sup>, <sup>f</sup> ref. <sup>22</sup>, <sup>g</sup> ref. <sup>30</sup>, <sup>h</sup> ref. <sup>7</sup> and <sup>i</sup> ref. <sup>10</sup>.

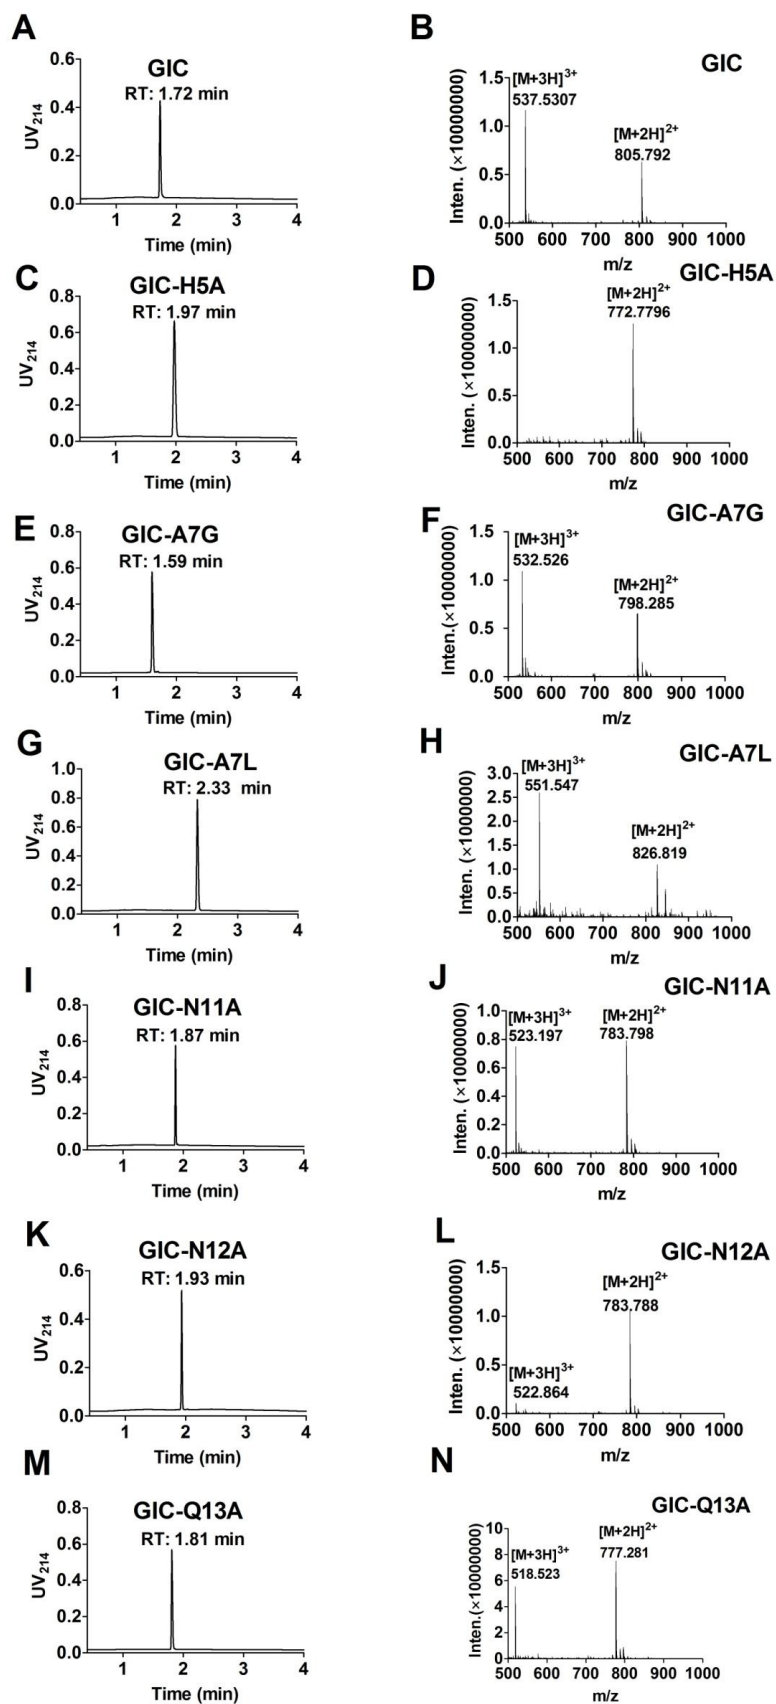

**Figure S1** | HPLC chromatograms with a retention time and ESI-MS data of

$\alpha$ -conotoxin GIC and its analogues. The peptides were analyzed on a waters ACQUITY UPLC BEH C18 column (2.1×50 mm, 1.7  $\mu$ m) using a linear gradient of 5% Buffer B to 40% Buffer B over 3.5 min with flow rate of 0.5 ml/min at temperature of 40 °C, where A = 0.1% trifluoroacetic acid (TFA) and B = 0.75% TFA, 90% acetonitrile, and the remainder water. Absorbance was monitored at 214 nm.

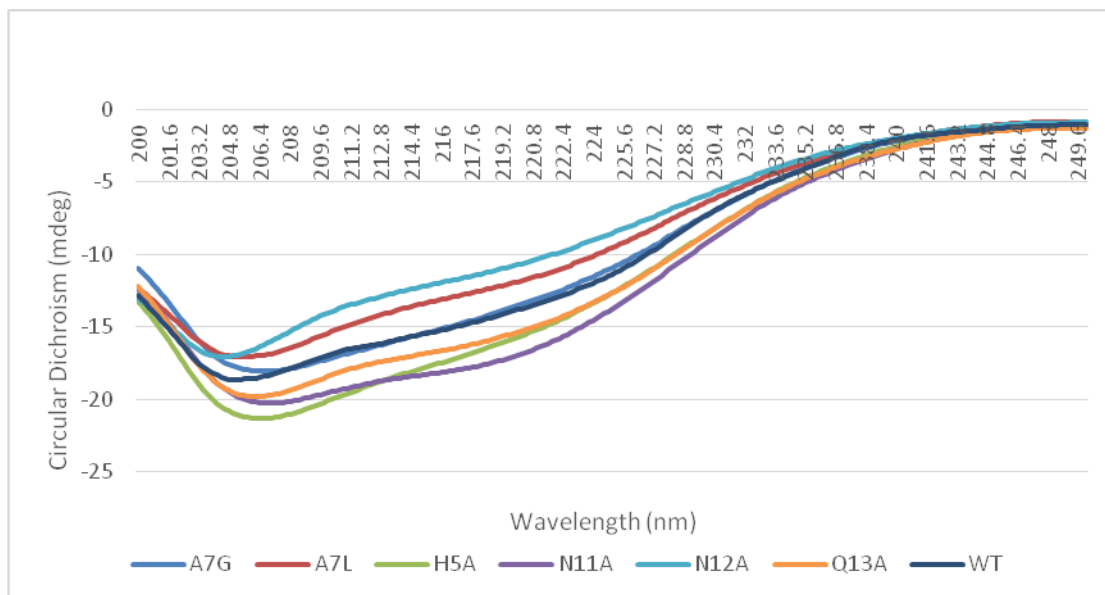

**Figure S2|** Circular dichroism of  $\alpha$ -conotoxin GIC and its analogues. CD spectra were recorded on a JASCO J-715 Spectropolarimeter. Spectra was recorded at room temperature under nitrogen atmosphere. Peptides were dissolved to 100  $\mu$ M. Spectra were recorded over a 200-250 nm range at 25 °C using an average of 3 scans (scan speed of 200 nm/min).

|                  | 20        | 40           | 60        |           |           |          |        |          |         |         |       |        |       |       |       |       |       |       |       |     |
|------------------|-----------|--------------|-----------|-----------|-----------|----------|--------|----------|---------|---------|-------|--------|-------|-------|-------|-------|-------|-------|-------|-----|
| Ac-AChBP         | --QANL--- | MRLKSDLFN--- | RSPMYPG-- | PT-KDDPLT | VTLGFTLQ  | DIVKADSS | STNEV  | 48       |         |         |       |        |       |       |       |       |       |       |       |     |
| Ls-AChBP         | LDRADI--- | ---          | LYN---    | IRQTSRPD  | VIP       | TQRDRPV  | AVSVSL | KFINILEV | NEITNEV | 48      |       |        |       |       |       |       |       |       |       |     |
| Human $\alpha$ 3 | -----     | SEAEHRL      | FERLFED-- | YNEIIRP-- | ---       | VANVSDP  | VIHF   | FEVSM    | SQLVKV  | DEVNQIM | 50    |        |       |       |       |       |       |       |       |     |
| Human $\alpha$ 4 | HVETRA    | HAEEER       | LLKKL     | FSG--     | YKWSRP--  | ---      | VANISD | VVLV     | RFGLS   | IAQLID  | VDEK  | NQMM   | 55    |       |       |       |       |       |       |     |
| Human $\beta$ 2  | -----     | TDTEER       | LVEHLL    | DPSRY     | NKLIRP--  | ---      | ATNGSE | LVTV     | QLMV    | SLAQLI  | SVH   | EREQIM | 52    |       |       |       |       |       |       |     |
| Human $\beta$ 4  | RV---     | ANAEEK       | LMDDDL    | LNKTR     | YNNLIRP-- | ---      | ATSSSQ | LISIKL   | QLSLA   | QLISV   | NERE  | QIM    | 54    |       |       |       |       |       |       |     |
|                  | 80        | 100          | 120       |           |           |          |        |          |         |         |       |        |       |       |       |       |       |       |       |     |
| Ac-AChBP         | DLVY      | YEQQR        | WKLNS     | LMSWDP    | NEYGNIT   | DFRT     | SAADI  | WTPDI    | ITAY    | S-STR   | RPVQ  | VLSP   | QIAV  | V     | 107   |       |       |       |       |     |
| Ls-AChBP         | DVVFW     | QQTT         | WSDRT     | LAWNS     | SHSPD     | QVSVPI   | SS--   | LWVPD    | LAA     | YN-A    | ISKPE | VLTP   | QLA   | R     | V     | 105   |       |       |       |     |
| Human $\alpha$ 3 | ETNL      | WLKQI        | WNDY      | KLKWN     | PSDY      | GGA      | EFM    | RVPA     | QKI     | WKPD    | IVLY  | NNAV   | GDFQ  | VDDK  | TKALL | 110   |       |       |       |     |
| Human $\alpha$ 4 | TTNV      | WVKQE        | WHDY      | KLRWD     | PADY      | ENV      | TSIR   | IPSEL    | IWRP    | IVLY    | NNAD  | GDF    | AVTH  | LTK   | AHL   | 115   |       |       |       |     |
| Human $\beta$ 2  | TTNV      | WLTQE        | WEDY      | RLTWK     | PEE       | FDNM     | KKVR   | LP       | SKHI    | WLPD    | VVLY  | NNAD   | GMYE  | VSVF  | YSNA  | VV    | 112   |       |       |     |
| Human $\beta$ 4  | TTNV      | WLKQE        | WTDY      | RLTWN     | SSRY      | EGV      | NILR   | IPAK     | RIWLP   | DIVLY   | NNAD  | GTYE   | VSVY  | TNLI  | IV    | 114   |       |       |       |     |
|                  | 140       | 160          | 180       |           |           |          |        |          |         |         |       |        |       |       |       |       |       |       |       |     |
| Ac-AChBP         | THDG      | SVMF         | IPAR      | LSFMC--   | DPTG      | VDS      | EEG    | ATCA     | VKFGS   | WVYS    | GFE   | IDL    | KTDT  | DQV   | D     | LS    | SS    | 165   |       |     |
| Ls-AChBP         | VSDG      | EVL          | YMPS      | IRQRF     | SC--      | DVSG     | VDTE   | SGAT     | CR      | IKIGS   | WTH   | HRS    | REIS  | VDPT  | TENS  | D     | SE    | 163   |       |     |
| Human $\alpha$ 3 | KYTGE     | VTW          | IPPA      | IFKSS     | CKID      | VTY      | FPFD   | Y-Q      | NCTM    | KFGS    | WSY   | DKAK   | IDLV  | LIGS  | SMNL  | KD    | 169   |       |       |     |
| Human $\alpha$ 4 | FHDGR     | VQW          | TPPA      | IYKSS     | CSID      | VTF      | FPFD   | Q-Q      | NCTM    | KFGS    | WTY   | DKAK   | IDLV  | NMHS  | RV    | DQLD  | 174   |       |       |     |
| Human $\beta$ 2  | SYDG      | SIF          | WLPPA     | IYKSA     | CKIE      | VKH      | FPFD   | Q-Q      | NCTM    | KFRS    | WTY   | DRTE   | IDLV  | LKSE  | VASL  | DD    | 171   |       |       |     |
| Human $\beta$ 4  | R         | SNG          | SVL       | WLPPA     | IYKSA     | CKIE     | VKY    | FPFD     | Q-Q     | NCTL    | KFRS  | WTY    | DHTE  | IDM   | VLM   | TP    | TASMD | DD    | 173   |     |
|                  | 200       | 220          | 240       |           |           |          |        |          |         |         |       |        |       |       |       |       |       |       |       |     |
| Ac-AChBP         | YYAS-     | SKYE         | ILSAT     | QTRQ      | VQH       | YS       | CCPE   | PEYI     | DVNL    | VVK     | FRER  | -----  | ----- | ----- | ----- | ----- | ----- | 205   |       |     |
| Ls-AChBP         | YFSQ      | YSRFE        | ILDVT     | QKKN      | SVT       | YS       | CCPE   | EA       | YED     | VEV     | SLN   | FRKK   | ----- | ----- | ----- | ----- | ----- | 204   |       |     |
| Human $\alpha$ 3 | YWES-     | GEWA         | IKAPG     | YKHD      | IKY       | N        | CC     | EEI      | YPDI    | TYSL    | YIR   | RLPL   | FYT   | INLI  | I     | PCLL  | ISFLT | 228   |       |     |
| Human $\alpha$ 4 | FWES-     | GEWV         | IVDA      | VGT       | YNT       | R        | K      | YE       | CCAE    | IY      | PDIT  | YAF    | VIR   | RLPL  | FYT   | INLI  | I     | PCLL  | ISCLT | 233 |
| Human $\beta$ 2  | FTPS-     | GEWD         | IVAL      | PGR       | RNEN      | PD       | ---    | STY      | VDIT    | YDFI    | IR    | KPL    | FYT   | INLI  | I     | PCVL  | ITSLA | 227   |       |     |
| Human $\beta$ 4  | FTPS-     | GEWD         | IVAL      | PGR       | RTV       | NP       | QD     | ---      | PSY     | VDV     | TYDFI | IK     | KPL   | FYT   | INLI  | I     | PCVL  | TTLLA | 229   |     |

**Figure S3** | Sequence alignment of Ac-AChBP, Ls-AChBP, and human  $\alpha$ 3, human  $\alpha$ 4, human  $\beta$ 2, human  $\beta$ 4 of nAChR subunits. Each subunit sequence numbering is shown at right side. Residues of the principal binding side that interact with  $\alpha$ -conotoxin GIC are shown in light green; residues of the complementary binding side are in light blue. The Arg residues which could be a potential reason of decreased GIC affinity for the Ls-AChBP, human  $\alpha$ 4 $\beta$ 2 nAChR and  $\alpha$ 3 $\beta$ 4 nAChR are typed in red.
